# Supplementary material for: Bovine Serum Albumin-Coated Niclosamide-Zein Nanoparticles as Potential Injectable Medicine against COVID-19
Source: MDPI journal article supplement (doi:10.3390/ma14143792), 2021-07-07
Supplement: s1 [file s1]

## Supporting Information

# Bovine Serum Albumin-Coated Niclosamide-Zein Nanoparticles as Potential Injectable Medicine against COVID-19

Sanoj Rejinold N <sup>1</sup>, Goeun Choi <sup>1,2,3</sup>, Huiyan Piao <sup>1</sup> and Jin-Ho Choy <sup>1,4,5,\*</sup>

<sup>1</sup> Intelligent Nanohybrid Materials Laboratory (INML), Institute of Tissue Regeneration Engineering (ITREN), Dankook University, Cheonan 31116, Korea; sanojrejinold@dankook.ac.kr (S.R.N.); goeun.choi@dankook.ac.kr (G.C.); 12192032@dankook.ac.kr (H.P.)

<sup>2</sup> College of Science and Technology, Dankook University, Cheonan 31116, Korea

<sup>3</sup> Department of Nanobiomedical Science and BK21 PLUS NBM Global Research Center for Regenerative Medicine, Dankook University, Cheonan 31116, Korea

<sup>4</sup> Department of Pre-medical Course, College of Medicine, Dankook University, Cheonan 31116, Korea

<sup>5</sup> Tokyo Tech World Research Hub Initiative (WRHI), Institute of Innovative Research, Tokyo Institute of Technology, Yokohama 226-8503, Japan

\* Correspondence: jhchoy@dankook.ac.kr

**Citation:** Rejinold, N.S.; Choi, G.; Piao, H.; Choy, J.-H. Bovine Serum Albumin-Coated Niclosamide-Zein Nanoparticles as Potential Injectable Medicine Against COVID-19. *Materials* **2021**, *14*, 3792. <https://doi.org/10.3390/ma14143792>

Academic Editor: Marilena Vlachou

Received: 5 June 2021

Accepted: 1 July 2021

Published: 7 July 2021

**Publisher's Note:** MDPI stays neutral with regard to jurisdictional claims in published maps and institutional affiliations.

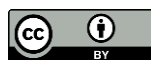

**Copyright:** © 2021 by the authors. Submitted for possible open access publication under the terms and conditions of the Creative Commons Attribution (CC BY) license (<http://creativecommons.org/licenses/by/4.0/>).

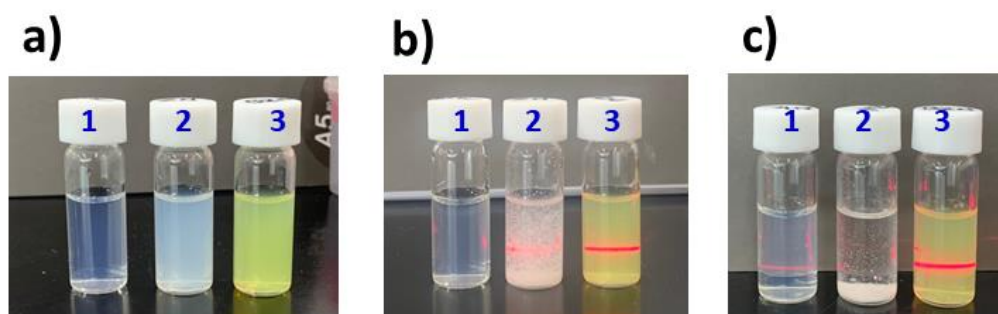

**Figure S1.** In-vitro colloidal stability of various samples in water at RT on day 1 (a), day 7 and c) day 21 for NIC NPs (1), Zein-NIC NPs (2) and BSA-Zein-NIC NPs (3), where, even after a 3 weeks at RT, the Tindall effect was still shown only by the BSA-Zein-NIC NPs.

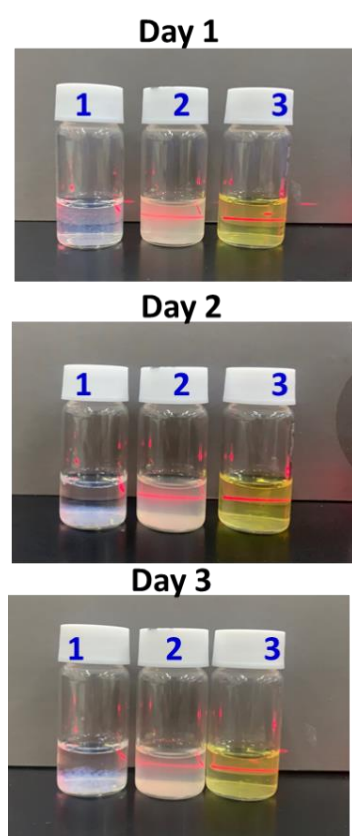

**Figure S2.** *In-vitro* stability in PBS for (1) NIC NPs, (2) Zein-NIC NPs and (3) BSA-Zein-NIC NPs on day 1, 2 and 3 respectively. The Tindall effect was significantly higher in the BSA-Zein-NIC NPs due to the steric stabilization provided by the BSA coating on Zein-NIC NPs.

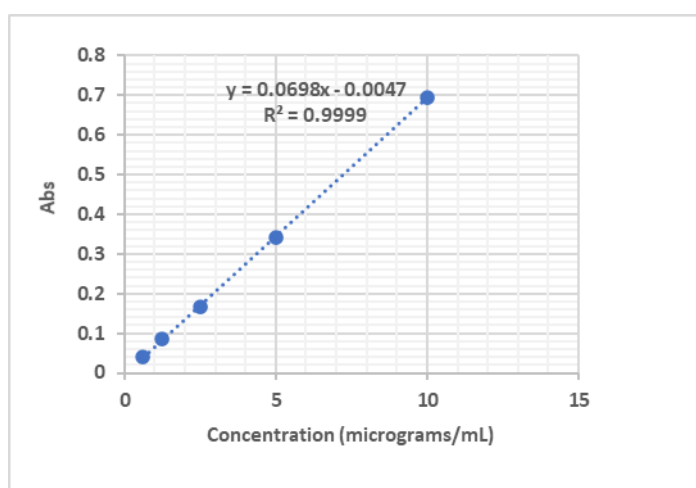

**Figure S3.** NIC calibration in ethanol.

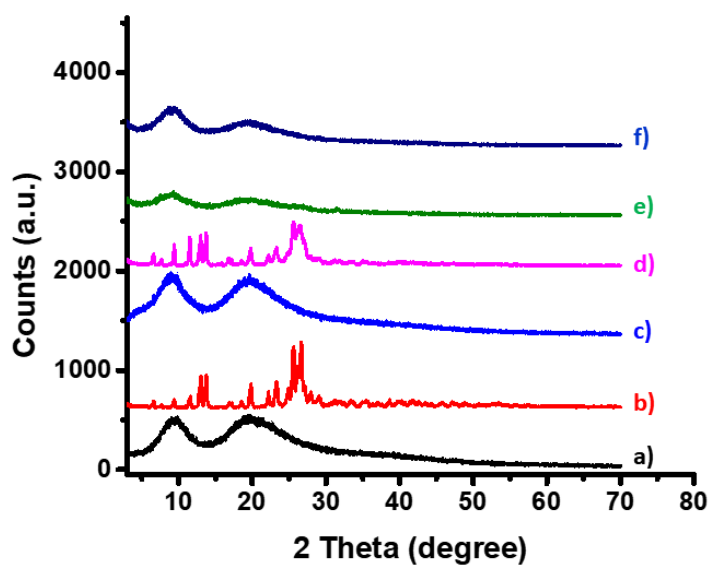

**Figure S4.** XRD analysis: (a) control BSA; (b) NIC ;(c) Zein; (d) recrystallized NIC; (e) Zein-NIC NPs and (f) BSA-Zein-NIC NPs.

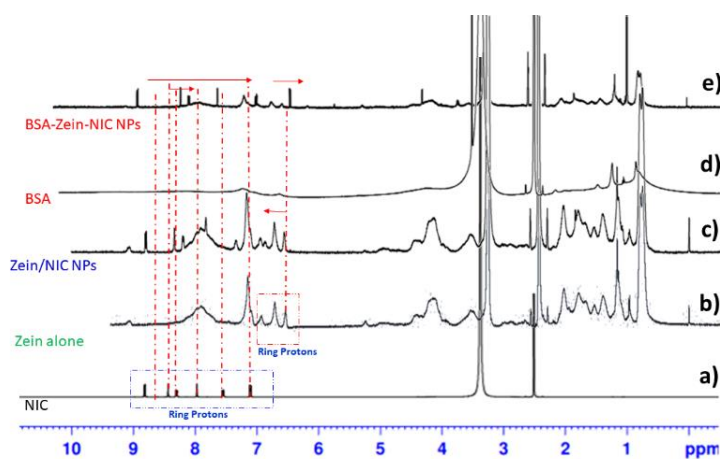

**Figure S5.** Proton NMR analysis for various samples such as a) intact NIC; b) Zein ; c) Zein-NIC NPs; d) BSA; and e) BSA-Zein-NIC NPs.

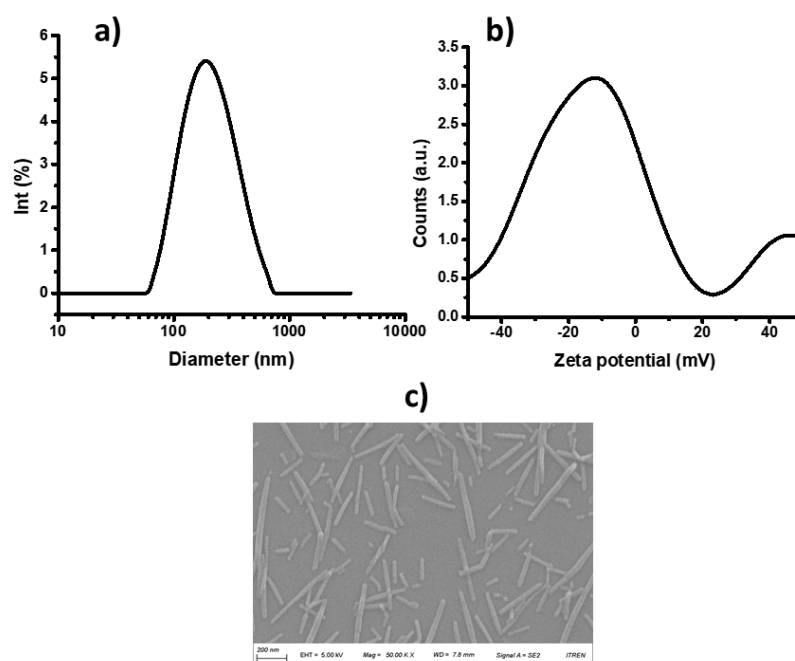

**Figure S6.** (a) DLS analysis, (b) Zeta potential, and (c) FE-SEM for NIC NPs prepared in ethanol/water mixture followed by probe sonication at 40% amplitude for 60 seconds.

**Table S1.** Stability analysis for Zein-NIC and BSA-Zein-NIC NPs in phosphate buffered saline.

| Sample           | Day | Size in diameter (nm) | PDI (a.u.)     |
|------------------|-----|-----------------------|----------------|
| Zein-NIC-NPs     | 1   | 813.00 ± 115          | 0.4315 ± 0.062 |
| Zein-NIC NPs     | 2   | 667.00 ± 1.48         | 0.0354 ± 0.027 |
| Zein-NIC NPs     | 3   | 512.45 ± 4.87         | 0.0301 ± 0.004 |
| BSA-Zein-NIC-NPs | 1   | 261.60 ± 6.50         | 0.3385 ± 0.012 |
| BSA-Zein-NIC NPs | 2   | 223.75 ± 1.34         | 0.3905 ± 0.013 |
| BSA-Zein-NIC NPs | 3   | 237.20 ± 5.51         | 0.3745 ± 0.009 |
